# Supplementary material
Source: publisher figshare collection journal article supplement (https://karger.figshare.com/ndownloader/files/23581859)
Supplement: Supplementary file 1 [file 23581859]

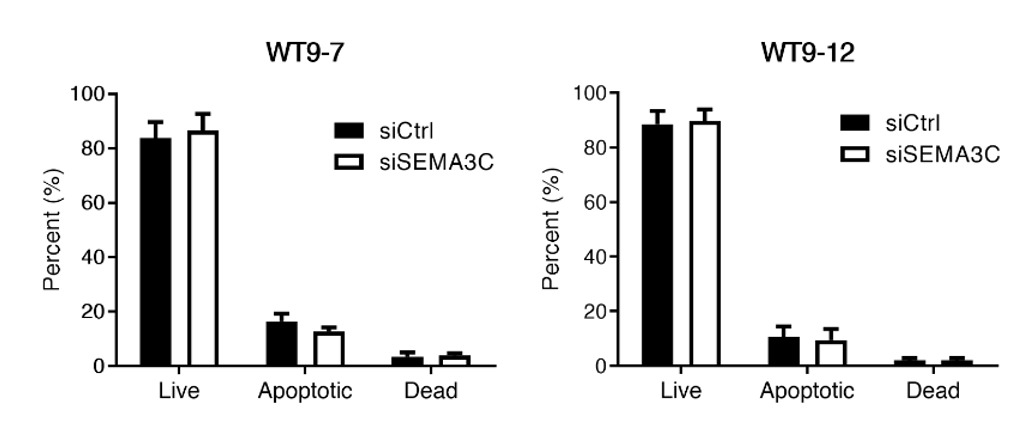


Supplementary Fig. 1. Apoptotic cell population was discerned via annexinV-PI stain which was analyzed by flow cytometry. At 48 hours after siSEMA3C transfection, annexinV-positive cells were measured in both PKD epithelial cell lines. In WT9-7 cells, apoptotic cells were changed from 16.4 ± 2.9 % to 12.8 ± 1.4 %, but there is no statistical significance. Also, portion of annexinV-positive cells remained unchanged in WT9-12 cells. The independent experiments were performed three times. The graph is presented as the mean ± SD.
